# Supplementary material for: Significantly enhanced catalytic performance of Pd nanocatalyst on AlOOH featuring abundant solid surface frustrated Lewis pair for improved hydrogen activation
Source: Royal Society of Chemistry journal article supplement (doi:10.1039/d4ra01852d), 2024-01-01
Supplement: d4ra01852d1.pdf [file d4ra01852d1.pdf]

# Significantly Enhanced Catalytic Performance of Pd Nanocatalyst on AlOOH Featuring Abundant Solid Surface Frustrated Lewis Pair for Improved Hydrogen Activation

Junwei Li,<sup>a</sup> Hongshuai Yin,<sup>a</sup> Sisi Liu,<sup>a</sup> Chaofa Xu,<sup>\*a,b</sup> and Zhixiong Cai<sup>\*a,b</sup>

<sup>a</sup> College of Chemistry, Chemical Engineering and Environment, Minnan Normal University, Zhangzhou, China

<sup>b</sup> Fujian Provincial Key Laboratory of Modern Separation and Analysis Science and Technology, Zhangzhou, China

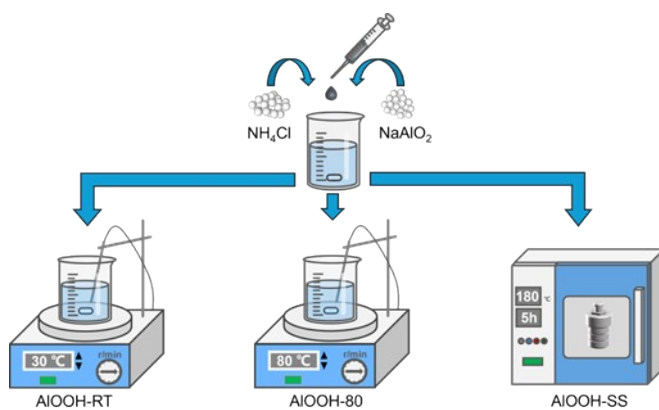

Figure S1. Schematic of the synthesis of AlOOH with different crystallinities.

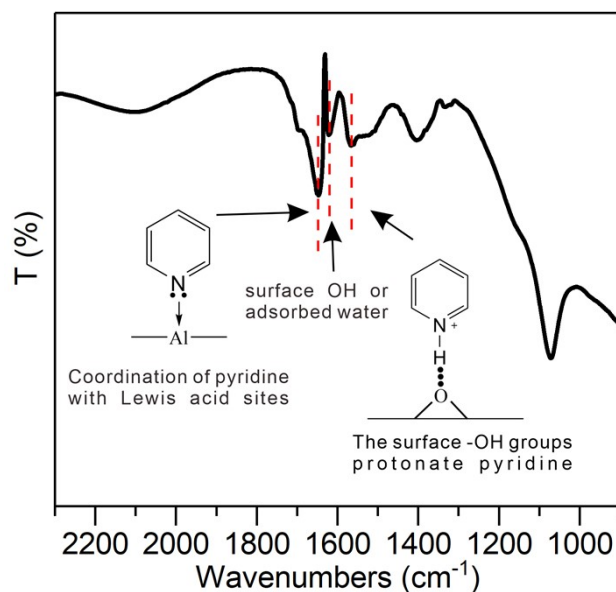

Figure S2. FT-IR spectra of pyridine adsorption on AlOOH-80. The absorption peak at 1647 cm<sup>-1</sup> corresponded to the coordination of pyridine molecules with unsaturated Al sites (Lewis acid sites) exposed on the surface. The absorption peak at 1615 cm<sup>-1</sup> was attributed to surface hydroxyl groups or adsorbed water, while at 1567 cm<sup>-1</sup>, protonation of pyridine by the surface -OH groups was indicated.

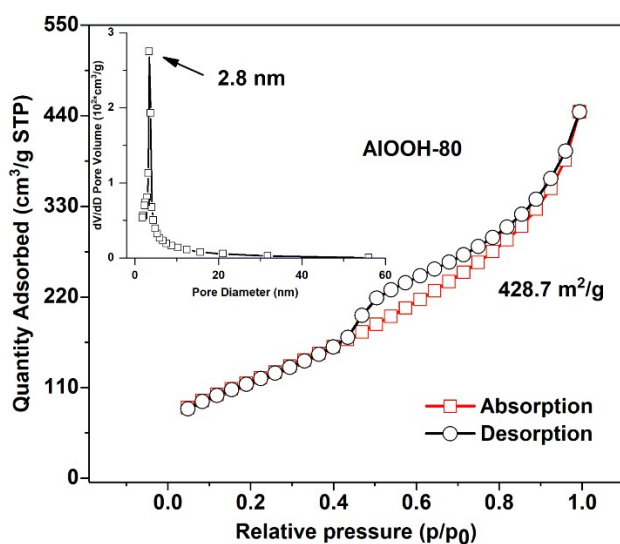

Figure S3. N<sub>2</sub> adsorption-desorption isotherms and pore diameter distribution curve of AlOOH-80.

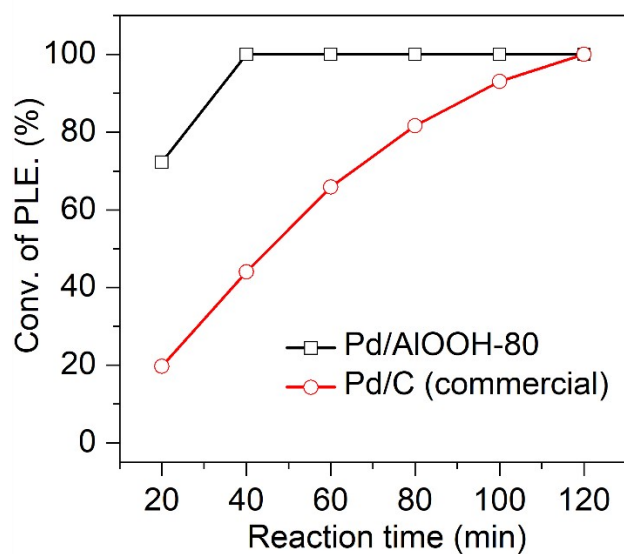

Figure S4. Pd/AlOOH-80 compared with commercial palladium on C (Pd/C) for catalytic performance.

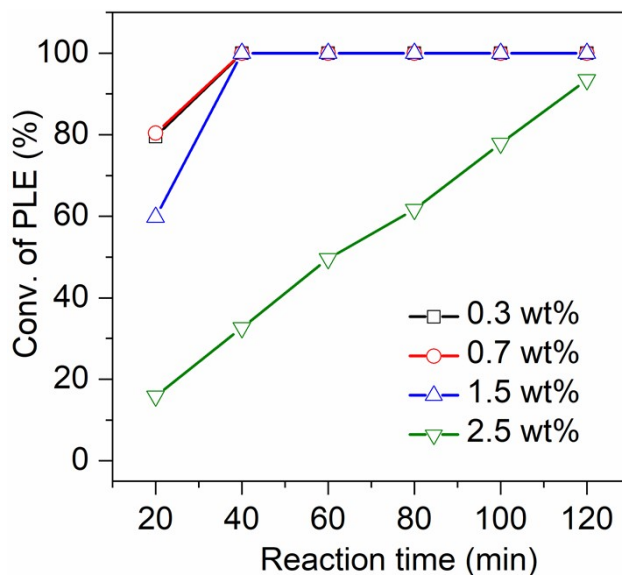

Figure S5. Catalytic performance of hydrogenation of phenylacetylene on Pd/AlOOH-80 with different Pd loadings.

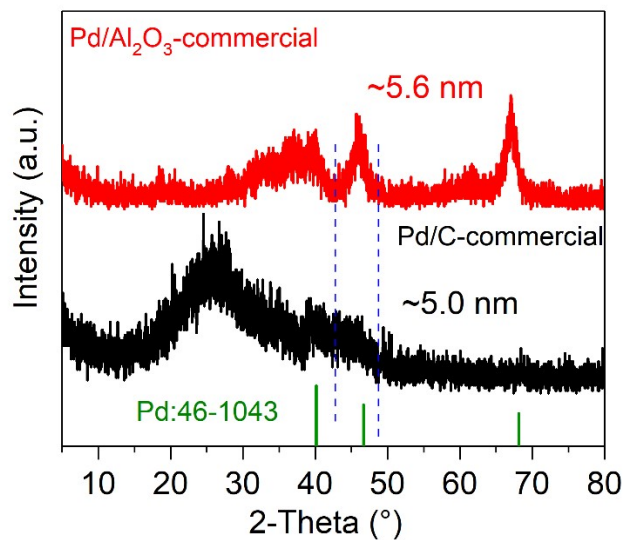

Figure S6. XRD patterns of commercial Pd/Al<sub>2</sub>O<sub>3</sub> and commercial Pd/C. The average size of nanoparticles was calculated using the Scherrer equation based on the half-width of peaks.

Table S1. Results of XPS analysis of O1s of the AlOOH catalysts

| Entry | Catalyst | O <sub>adH2O</sub> /O <sub>Total</sub><br>(%) |
|-------|----------|-----------------------------------------------|
| 1     | AlOOH-80 | 8.7                                           |
| 2     | AlOOH-RT | 17.2                                          |
| 3     | AlOOH-SS | 22.5                                          |

Table S2. The Pd content in Pd/AlOOH-80 catalyst was measured by ICP-AES.

| Entry | Catalyst | Theoretical load<br>(wt%) | Actual load<br>(wt%) |
|-------|----------|---------------------------|----------------------|
| 1     | AlOOH-80 | 0.3                       | 0.4                  |
| 2     | AlOOH-80 | 0.7                       | 0.7                  |
| 3     | AlOOH-80 | 1.5                       | 1.7                  |
| 4     | AlOOH-80 | 2.5                       | 2.2                  |

Table S3. Catalytic performance comparison between Pd/AlOOH-80 and previously reported catalysts of the hydrogenation of phenylacetylene.

| Entry | Catalyst                                                                   | T (°C) | Hydrogen source        | Time   | Con. (%) | Reaction rate (h <sup>-1</sup> ) | Ref.      |
|-------|----------------------------------------------------------------------------|--------|------------------------|--------|----------|----------------------------------|-----------|
| 1     | Pd <sub>2</sub> Cu <sub>2</sub> @ $\alpha$ -Al <sub>2</sub> O <sub>3</sub> | 30     | 0.1 MPa H <sub>2</sub> | 70 min | >99.9    | 146.2                            | 1         |
| 2     | Pd <sub>1</sub> /NC-PHF                                                    | 60     | 0.5 MPa H <sub>2</sub> | 2 h    | 93.1     | 88.5                             | 2         |
| 3     | Pd <sub>1</sub> /BP                                                        | 80     | 2 bar H <sub>2</sub>   | 4 h    | 95       | 133.0                            | 3         |
| 4     | Pd <sub>4,5</sub> Se NCs/C                                                 | 110    | 0.1 MPa H <sub>2</sub> | 1.5 h  | 100      | 358.6                            | 4         |
| 5     | PdCu <sub>2</sub> @MF-H                                                    | 30     | 0.1 MPa H <sub>2</sub> | 4 h    | 100      | 125.9                            | 5         |
| 6     | PdCu@Cu <sub>2</sub> O                                                     | 30     | 0.1 MPa H <sub>2</sub> | 80 min | >99      | 1500.0                           | 6         |
| 7     | Pd <sub>1</sub> /Cu <sub>2</sub> O                                         | 30     | 0.1 MPa H <sub>2</sub> | 60 min | 100      | 500.0                            | 7         |
| 8     | Pd/AlOOH-80                                                                | 30     | 0.1 MPa H <sub>2</sub> | 40 min | 100      | 4500.0                           | This work |

$$\text{Reaction rate} = \frac{\text{moles of phenylacetylene}}{\text{moles of Pd} \times \text{reaction time (h)}}$$

## References

1. J. Li, W. Suo, Y. Huang, M. Chen, H. Ma, C. Liu, H. Zhang, K. Liang, Z. J. J. o. C. Dong and I. Science, 2023, **652**, 1053-1062.
2. S. Li, G. Yue, H. Li, J. Liu, L. Hou, N. Wang, C. Cao, Z. Cui and Y. J. C. E. J. Zhao, 2023, **454**, 140031.
3. C. Chen, W. Ou, K. M. Yam, S. Xi, X. Zhao, S. Chen, J. Li, P. Lyu, L. Ma and Y. J. A. M. Du, 2021, **33**, 2008471.
4. M. Wang, L. Liang, X. Liu, Q. Sun, M. Guo, S. Bai and Y. J. J. o. C. Xu, 2023, **418**, 247-255.
5. M. Guo, Q. Meng, W. Chen, Z. Meng, M. L. Gao, Q. Li, X. Duan and H. L. J. A. C. Jiang, 2023, **135**, e202305212.
6. K. Liu, L. Jiang, W. Huang, G. Zhu, Y.-J. Zhang, C. Xu, R. Qin, P. Liu, C. Hu and J. J. N. C. Wang, 2022, **13**, 2597.
7. K. Liu, R. Qin, L. Zhou, P. Liu, Q. Zhang, W. Jing, P. Ruan, L. Gu, G. Fu and N. J. C. C. Zheng, 2019, 207-214.
